# Supplementary material
Source: publisher site journal article supplement (https://static.cambridge.org/content/id/urn:cambridge.org:id:article:S1352465819000110/resource/name/S1352465819000110supp002.docx)
Supplement: Supplementary file 1 [file S1352465819000110supp002.docx]

**Supplementary Figure 2** Mean physical functioning over time and the significance level for the

interaction of treatment outcome between centers.

**

***p*<.01
